# Supplementary material for: MZ1 co-operates with trastuzumab in HER2 positive breast cancer
Source: PubMed Central journal article supplement (PMC7980639; doi:10.1186/s13046-021-01907-9), 2021-03-19

**A****Downregulated genes (12 hours)**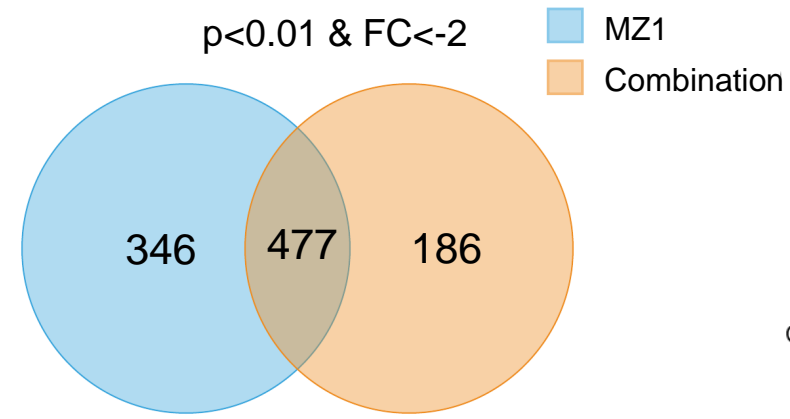**MZ1 downregulated genes (12 H)**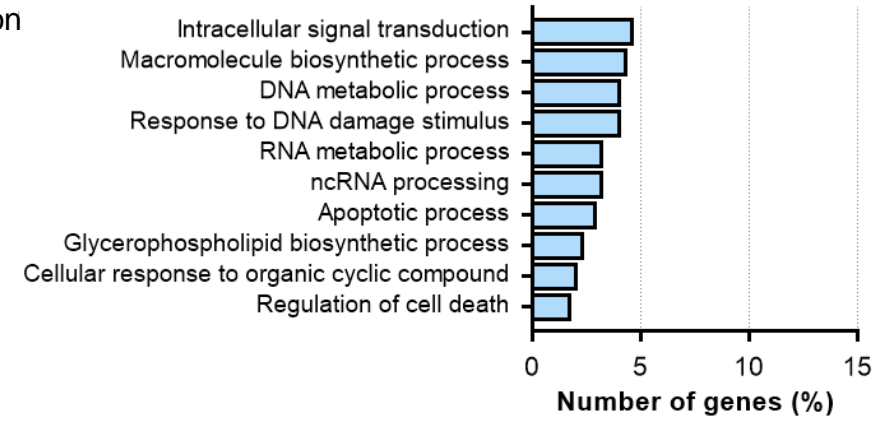**MZ1-Combination downregulated genes (12 H)**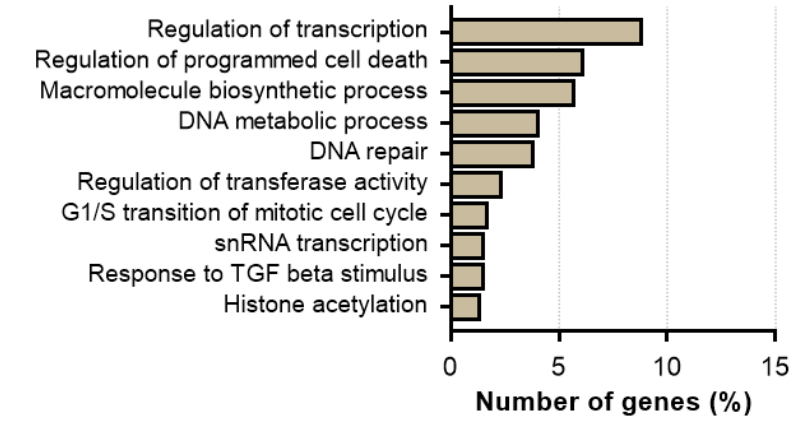**Combination downregulated genes (12 H)**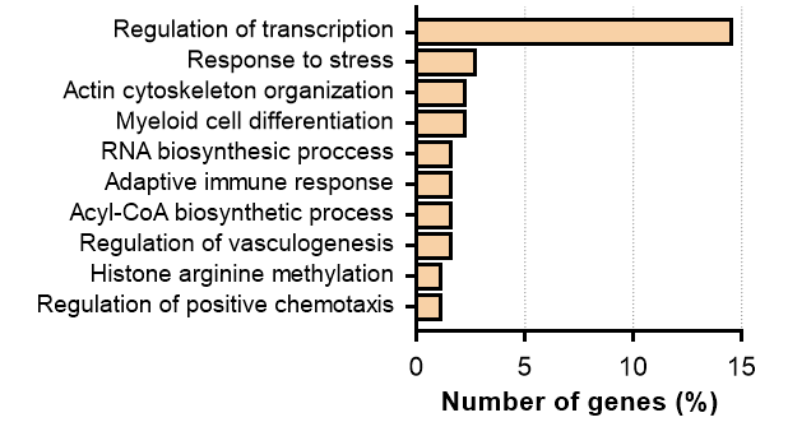**Upregulated genes (12 hours)**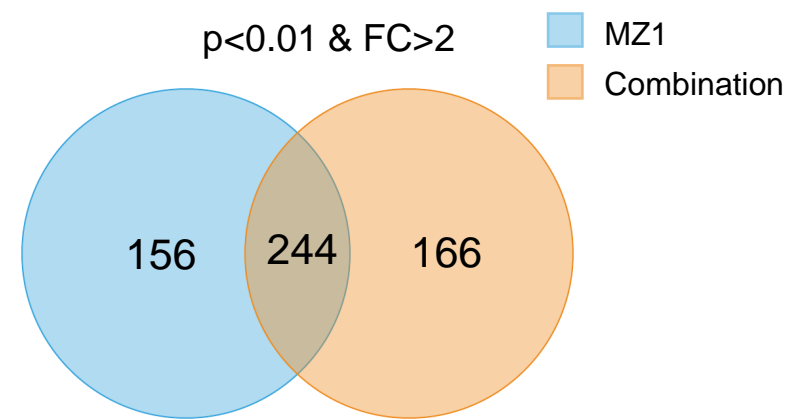**MZ1 upregulated genes (12 H)**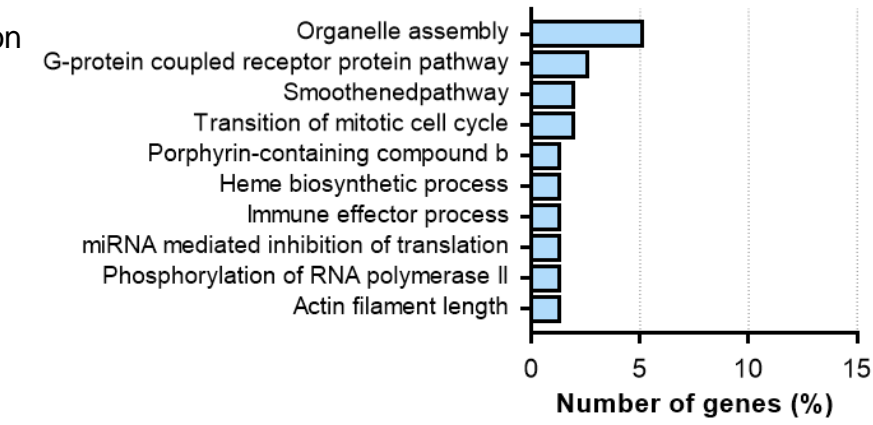**MZ1-Combination upregulated genes (12 H)**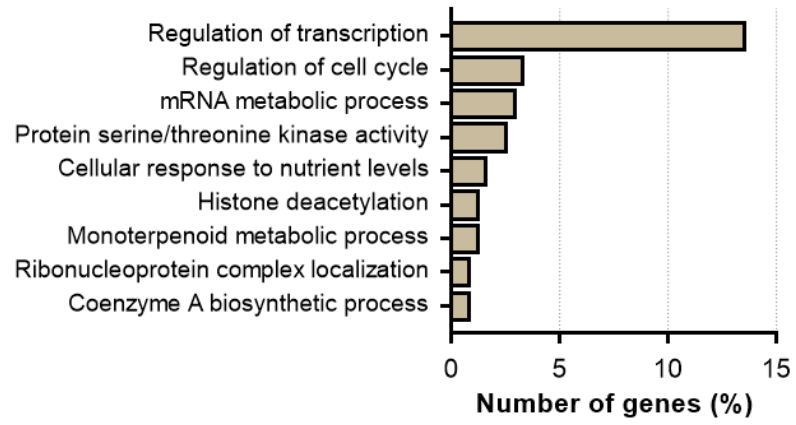**Combination upregulated genes (12 H)**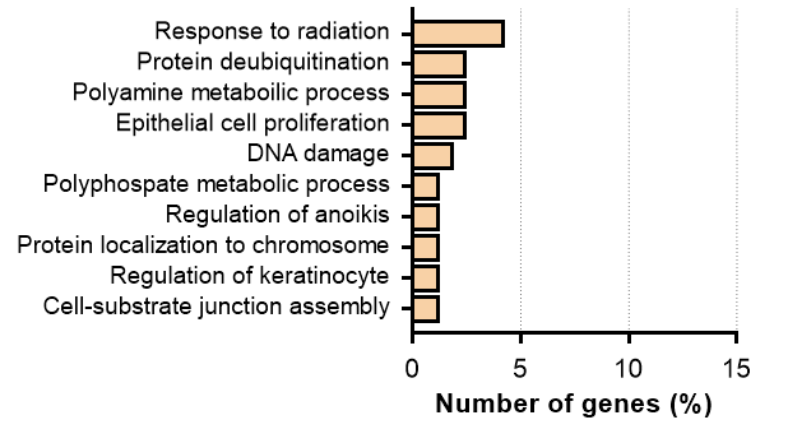**B****Downregulated genes (24 hours)**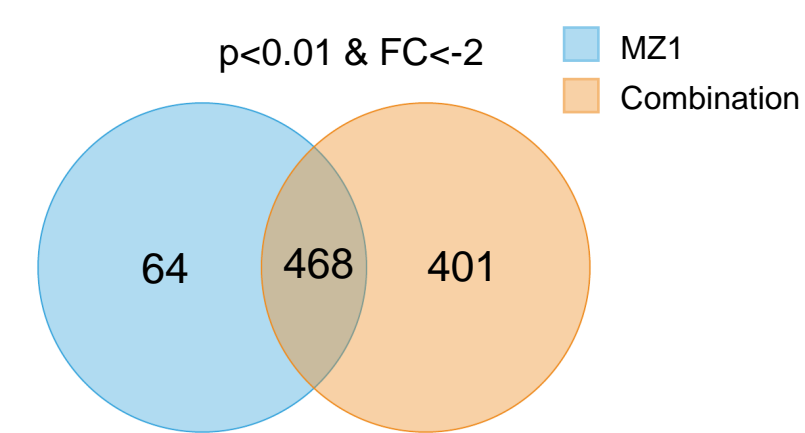**MZ1 upregulated genes (24 H)**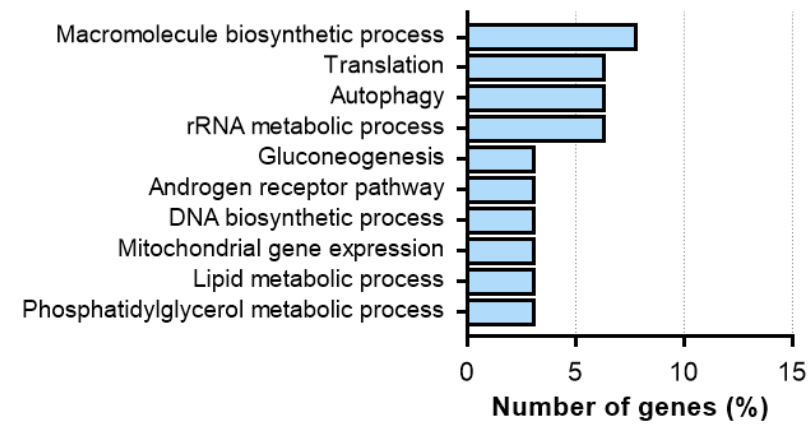**MZ1-Combination downregulated genes (24 H)**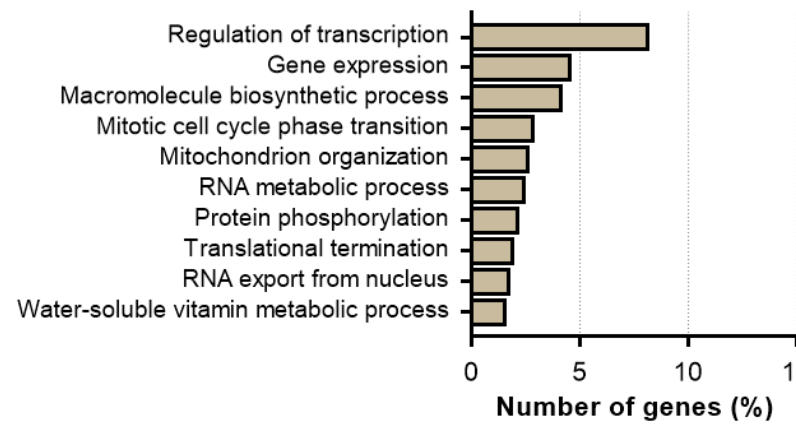**Combination downregulated genes (24 H)**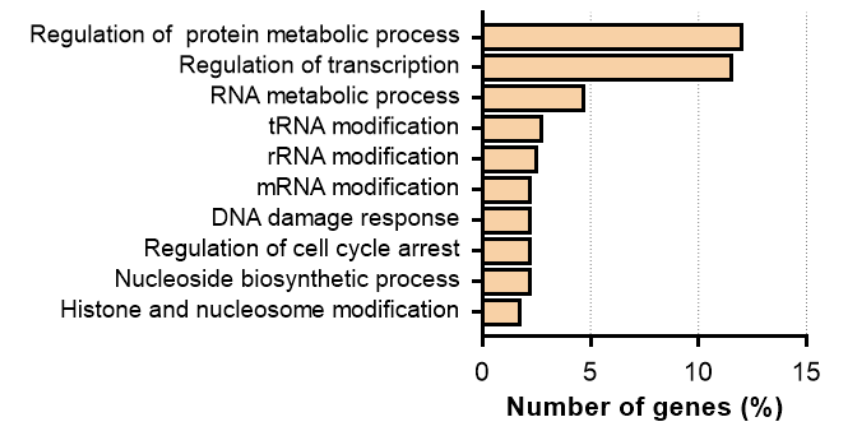**Upregulated genes (24 hours)**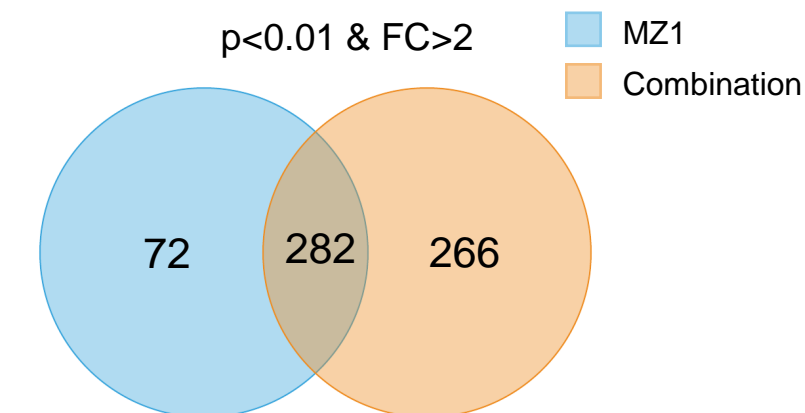**MZ1 upregulated genes (24 H)**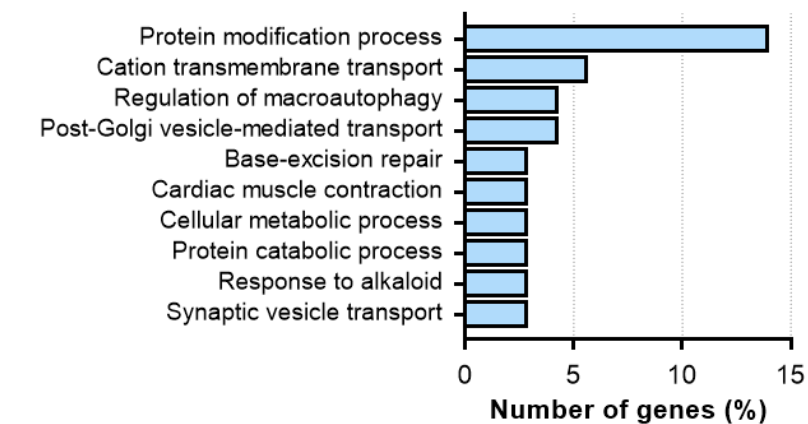**MZ1-Combination upregulated genes (24H)**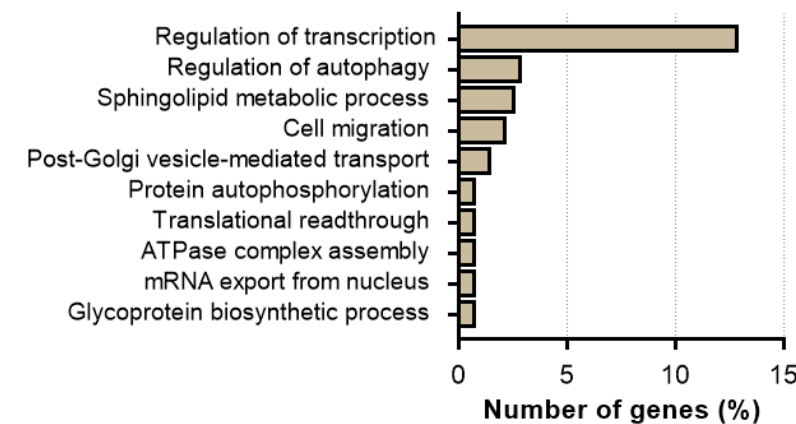**Combination upregulated genes (24 H)**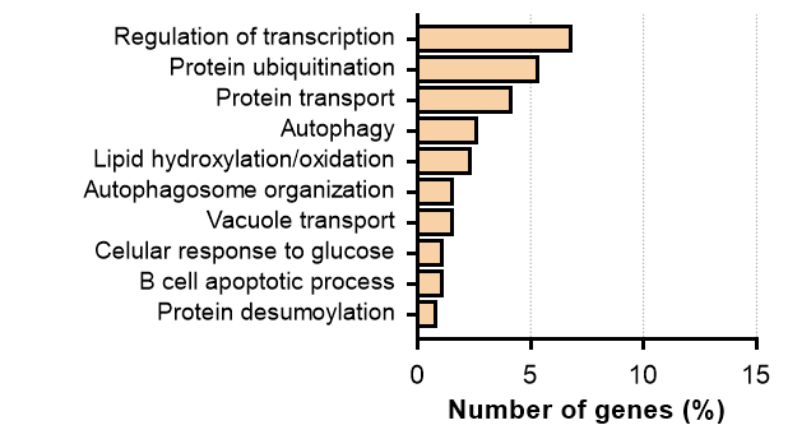

Supplement: 13046_2021_1907_MOESM6_ESM.pdf [file 13046_2021_1907_MOESM6_ESM.pdf]
