# Supplementary material for: MZ1 co-operates with trastuzumab in HER2 positive breast cancer
Source: PubMed Central journal article supplement (PMC7980639; doi:10.1186/s13046-021-01907-9), 2021-03-19

A

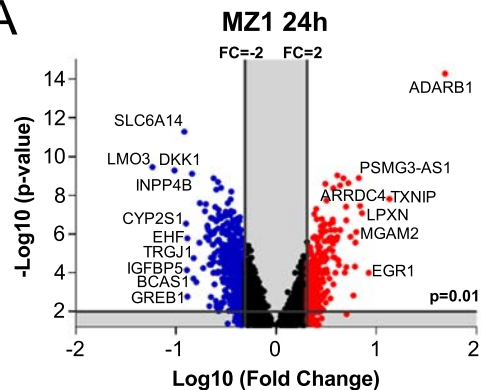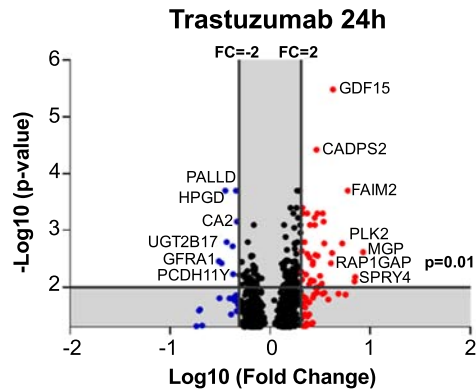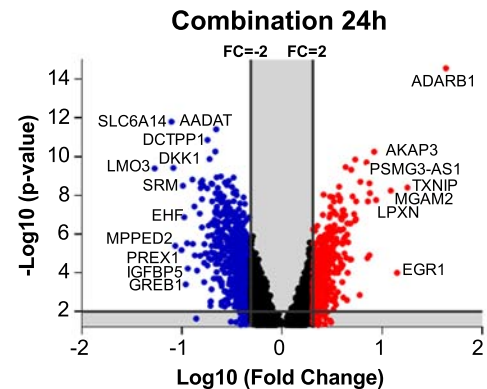

B

### Downregulated genes (24 hours)

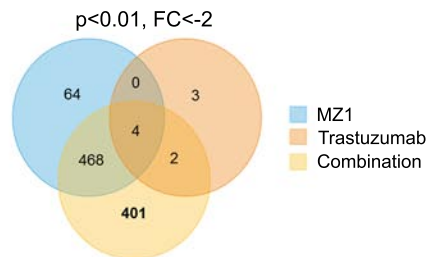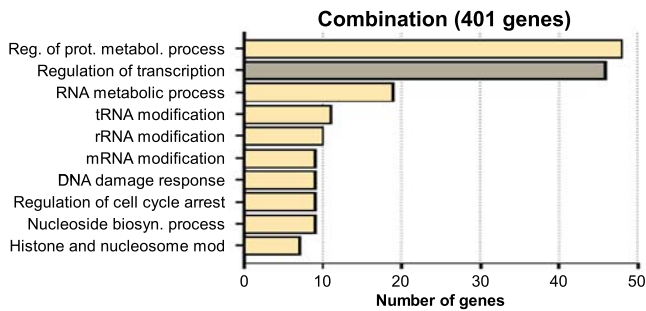

C

### Upregulated genes (24 hours)

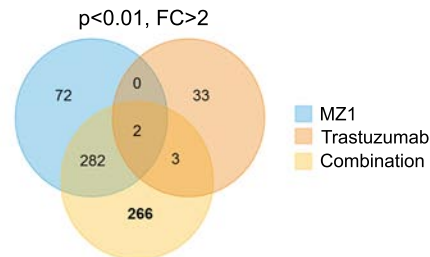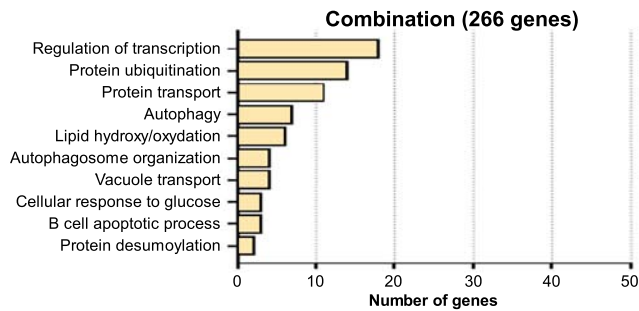

Supplement: 13046_2021_1907_MOESM5_ESM.pdf [file 13046_2021_1907_MOESM5_ESM.pdf]
